# Supplementary material
Source: publisher site journal article supplement (https://www.dovepress.com/get_supplementary_file.php?f=455497.docx)
Supplement: Supplementary file 1 [file get_supplementary_file.php]

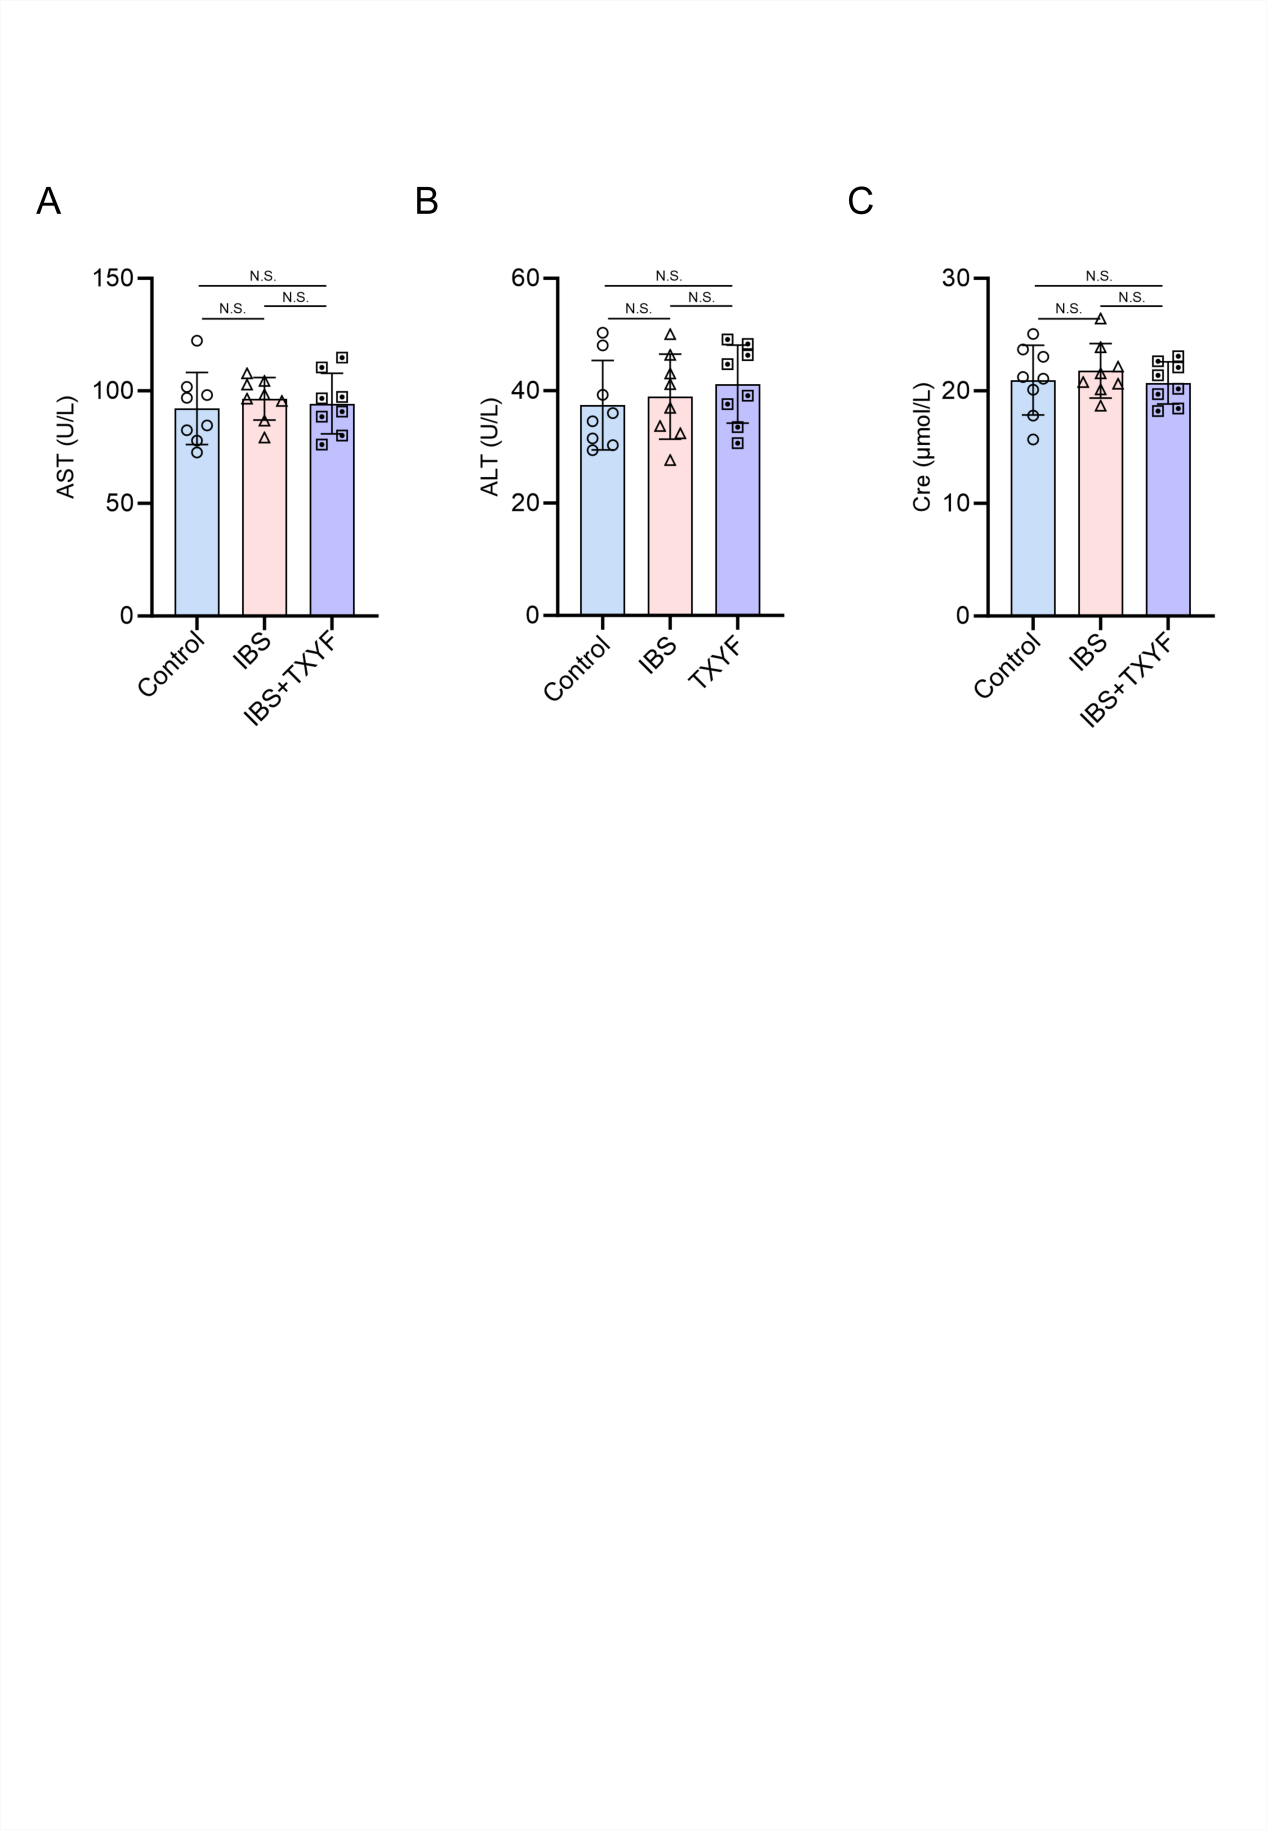


Figure S1: Effects of TXYF on hepatorenal toxicity in vivo. (A-C) Serum AST, ALT and Cre levels in each Group (N = 8). The method and dosage of molding and administration are described in the Method. Values were means ± SD. *N.S. P > 0.05* Control *vs.* IBS or IBS + TXYF or IBS *vs.* IBS + TXYF. N represents the number of mice selected, and one mouse represents one repeat.


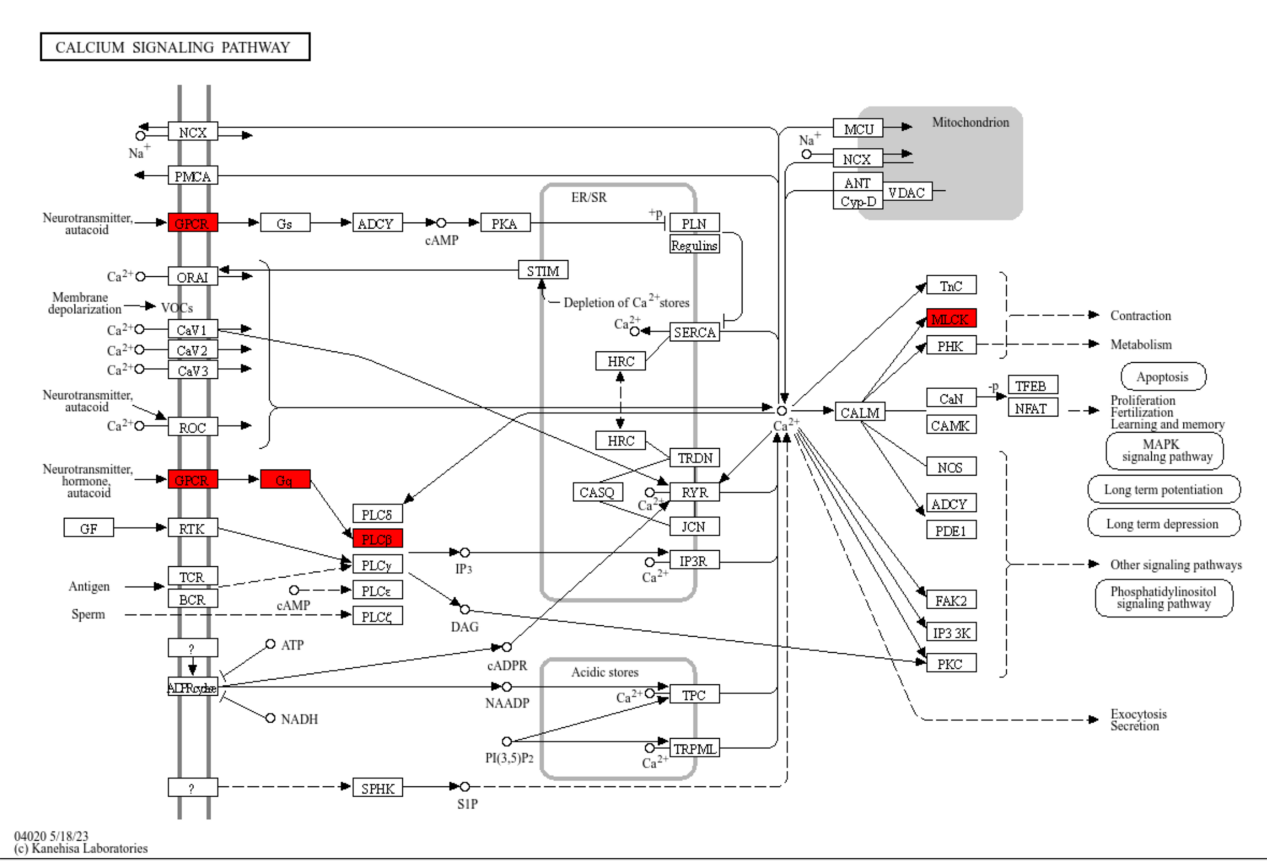


Figure S2: Neurotransmitter (Ach) and muscarinic receptor (CHRM3) activation of GQ/G11 to regulate downstream PLC/MYLK pathway map.
